# Supplementary material for: Hair cortisol as a hypothalamic-pituitary-adrenal axis biomarker in pregnant women with asthma: a retrospective observational study
Source: PubMed Central journal article supplement (PMC4955128; doi:10.1186/s12884-016-0962-4), 2016-07-20
Supplement: 12884_2016_962_MOESM1_ESM.pdf [file 12884_2016_962_MOESM1_ESM.pdf]

## Hair cortisol as a hypothalamus-pituitary-adrenal axis biomarker in pregnant women with asthma: a retrospective observational study

Laura Smy, Kaitlyn Shaw, Ursula Amstutz, Anne Smith, Howard Berger, Bruce Carleton, Gideon Koren

Table S1. Correlations for hair cortisol concentrations with potential confounders.\*

|                                 | Controls              |                       |                       |                       |                      | No ICS                |                       |                       |                      |                      | ICS Treated           |                       |                       |                       |                       |
|---------------------------------|-----------------------|-----------------------|-----------------------|-----------------------|----------------------|-----------------------|-----------------------|-----------------------|----------------------|----------------------|-----------------------|-----------------------|-----------------------|-----------------------|-----------------------|
|                                 | PC                    | T1                    | T2                    | T3                    | PP                   | PC                    | T1                    | T2                    | T3                   | PP                   | PC                    | T1                    | T2                    | T3                    | PP                    |
| Segment length                  | -0.248<br>0.194<br>29 | .<br>.<br>30          | -0.279<br>0.176<br>25 | -0.257<br>0.446<br>11 | 0.738<br>0.262<br>4  | .<br>.<br>29          | -0.283<br>0.129<br>30 | -0.155<br>0.492<br>22 | -0.102<br>0.795<br>9 | .<br>.<br>3          | .<br>.<br>50          | -0.079<br>0.571<br>54 | -0.112<br>0.502<br>38 | -0.446<br>0.055<br>19 | -0.166<br>0.647<br>10 |
| Hair sample age                 | -0.317<br>0.094<br>29 | -0.376<br>0.04<br>30  | -0.392<br>0.053<br>25 | -0.082<br>0.811<br>11 | 0.8<br>0.2<br>4      | -0.201<br>0.295<br>29 | -0.268<br>0.152<br>30 | -0.393<br>0.071<br>22 | -0.833<br>0.005<br>9 | -1<br>.<br>3         | -0.244<br>0.088<br>50 | -0.381<br>0.005<br>54 | -0.367<br>0.023<br>38 | -0.458<br>0.049<br>19 | -0.455<br>0.187<br>10 |
| Pregnant BMI                    | -0.325<br>0.085<br>29 | -0.131<br>0.491<br>30 | -0.112<br>0.593<br>25 | -0.497<br>0.12<br>11  | -0.8<br>0.2<br>4     | 0.069<br>0.755<br>23  | -0.015<br>0.944<br>24 | 0.12<br>0.646<br>17   | -0.143<br>0.76<br>7  | 1<br>.<br>2          | 0.303<br>0.065<br>38  | 0.214<br>0.184<br>40  | 0.15<br>0.437<br>29   | 0.174<br>0.553<br>14  | 0.2<br>0.747<br>5     |
| Pre-pregnancy BMI               | -0.19<br>0.323<br>29  | -0.014<br>0.941<br>30 | -0.147<br>0.483<br>25 | -0.664<br>0.026<br>11 | -0.8<br>0.2<br>4     | 0.196<br>0.37<br>23   | 0.149<br>0.488<br>24  | 0.24<br>0.353<br>17   | 0.286<br>0.535<br>7  | 1<br>.<br>2          | 0.429<br>0.006<br>39  | 0.382<br>0.014<br>41  | 0.246<br>0.198<br>29  | 0.216<br>0.459<br>14  | 0.3<br>0.624<br>5     |
| PSS score                       | 0.123<br>0.559<br>25  | 0.241<br>0.246<br>25  | 0.081<br>0.72<br>22   | -0.546<br>0.102<br>10 | -0.4<br>0.6<br>4     | 0.563<br>0.146<br>8   | 0.707<br>0.05<br>8    | 0.371<br>0.468<br>6   | -0.3<br>0.624<br>5   | -1<br>.<br>2         | -0.103<br>0.667<br>20 | 0.042<br>0.853<br>22  | 0.153<br>0.571<br>16  | 0.021<br>0.948<br>12  | 0.1<br>0.873<br>5     |
| No. of hair washes per week     | -0.333<br>0.077<br>29 | -0.277<br>0.138<br>30 | -0.276<br>0.181<br>25 | 0.038<br>0.911<br>11  | 0.738<br>0.262<br>4  | 0.178<br>0.428<br>22  | 0.257<br>0.236<br>23  | 0.395<br>0.13<br>16   | 0.698<br>0.081<br>7  | .<br>.<br>2          | -0.033<br>0.842<br>39 | -0.027<br>0.867<br>41 | 0.051<br>0.791<br>29  | -0.194<br>0.526<br>13 | -0.1<br>0.873<br>5    |
| No. days since last washing     | 0.365<br>0.056<br>28  | 0.175<br>0.374<br>28  | 0.03<br>0.885<br>25   | 0.103<br>0.763<br>11  | 0.775<br>0.225<br>4  | -0.019<br>0.935<br>21 | 0.139<br>0.538<br>22  | 0.201<br>0.473<br>15  | 0.37<br>0.47<br>6    | -1<br>.<br>2         | 0.062<br>0.727<br>34  | 0.01<br>0.955<br>36   | -0.085<br>0.687<br>25 | -0.259<br>0.416<br>12 | -0.224<br>0.718<br>5  |
| Chemical treatment <sup>b</sup> | -0.168<br>0.383<br>29 | -0.171<br>0.365<br>30 | -0.171<br>0.413<br>25 | -0.331<br>0.320<br>11 | -0.327<br>0.673<br>4 | -0.318<br>0.130<br>24 | -0.267<br>0.197<br>25 | -0.152<br>0.547<br>18 | -0.404<br>0.321<br>8 | -0.983<br>0.116<br>3 | -0.129<br>0.403<br>44 | 0.161<br>0.286<br>46  | 0.071<br>0.704<br>31  | -0.108<br>0.714<br>14 | -0.554<br>0.333<br>5  |

PC = preconception, T1 = first trimester, T2 = second trimester, T3 = third trimester, PP = postpartum, BMI = body mass index, PSS = perceived stress scale.

\*Results listed top to bottom are the correlation coefficient, p-value<sup>a</sup>, and *n*.

<sup>a</sup>p-values are not adjusted for multiple comparisons.

<sup>b</sup>Color or relaxer. All hair cortisol concentrations were natural log transformed and outliers were removed to normalize the data (which was unsuccessful for the ICS Treated PC results) in order to perform the point biserial correlation.
